# Supplementary material for: Photoreduction of quinones by thiols sensitized by phthalocyanines
Source: Royal Society of Chemistry journal article supplement (doi:10.1039/c7pp00115k), 2017-04-27
Supplement: c7pp00115k1.pdf [file c7pp00115k1.pdf]

## Electronic Supplementary Information

### Photoreduction of Quinones by Thiols Sensitized by Phthalocyanines

Masaaki Yusa<sup>a</sup> and Toshi Nagata<sup>\*b</sup>

<sup>a</sup> Department of Structural Molecular Science, The Graduate University for Advanced Studies, 5-1 Higashiyama, Myodaiji, Okazaki 444-8787, Japan.

<sup>b</sup> Department of Applied Chemistry, Faculty of Science and Technology, Meijo University, 1-501 Shiogamaguchi, Tempaku, Nagoya 468-8502, Japan.

E-mail: [tnagata@meijo-u.ac.jp](mailto:tnagata@meijo-u.ac.jp), FAX: +81-52-838-2591

Keywords: photoreduction, phthalocyanine, quinone, thiol

#### Table of Contents.

**Figure S1.** The “merry-go-round” apparatus used for photochemical reactions.

**Figure S2.** The photochemical setup for determination of quantum yields.

**Figure S3.** Single photon counting measurement of ZnPc fluorescence.

**Figure S4.** The Stern–Volmer plot of the relative fluorescence intensity to the concentration of quinone.

**Figure S5.** Cyclic voltammograms of the phthalocyanines.

**Figure S6.** The initial rates of photoreaction with various concentrations of the quinone (2,5-di-*t*-butylbenzoquinone).

**Figure S7.** Triplet lifetime measurements of ZnPc in the presence of **1a**, **1c**, and **1d**.

**Figure S8.** The closest encounter pair of ZnPc and quinone **1c** found by the molecular dynamics simulation.

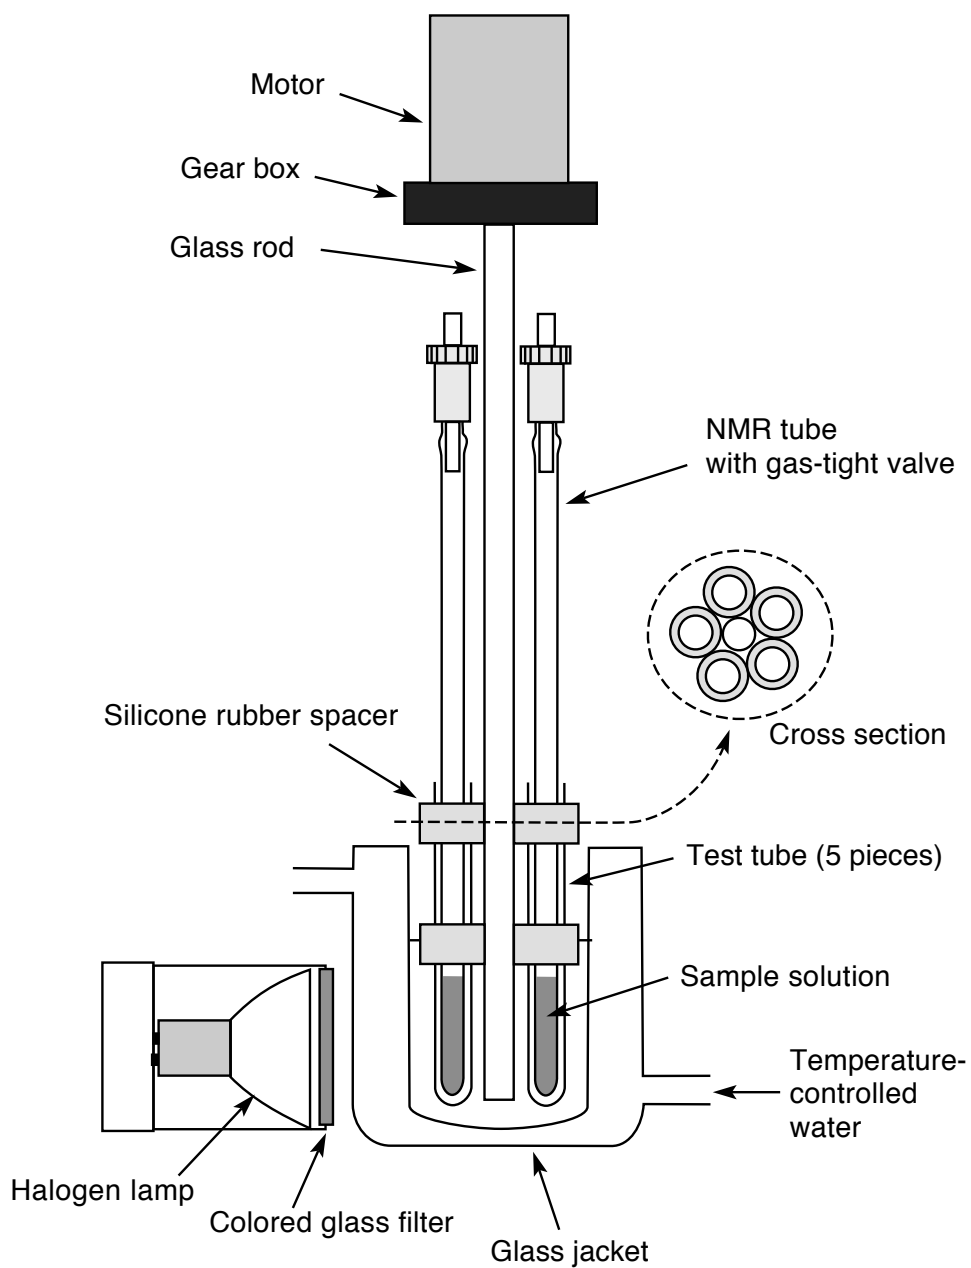

**Figure S1.** The “merry-go-round” apparatus used for photochemical reactions.

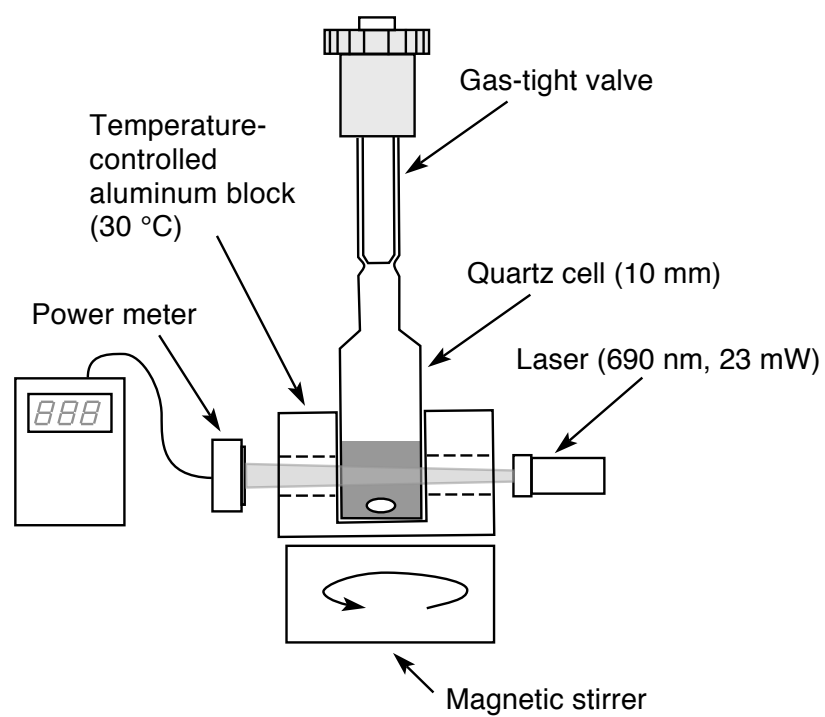

**Figure S2.** The photochemical setup for determination of quantum yields.

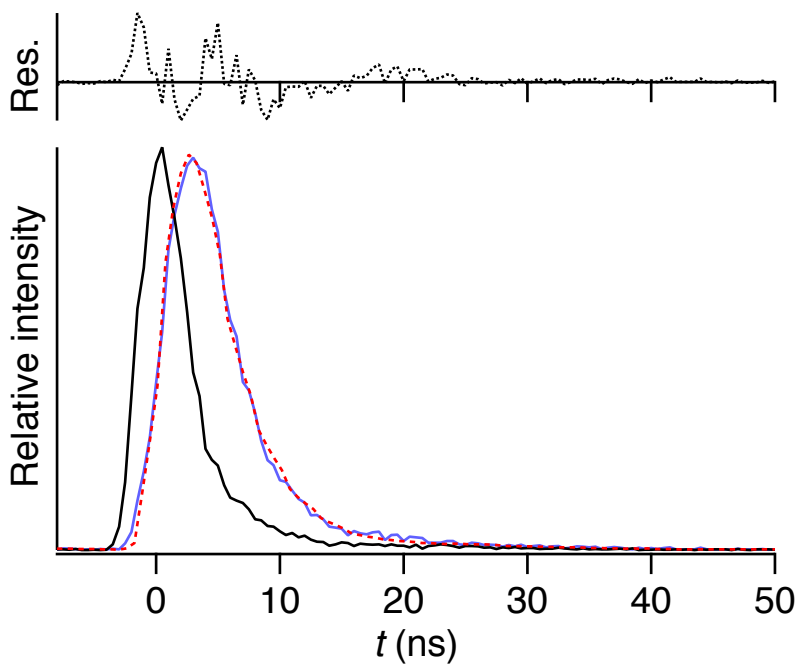

**Figure S3.** Single photon counting measurement of ZnPc fluorescence (2.0  $\mu\text{mol/L}$  in degassed toluene, 600 nm/10 ns excitation pulse, observation at 700 nm). Black: instrumental response function, blue: observed fluorescence, dotted red: fitted curve by deconvolution analysis with  $\tau = 2.2$  ns.

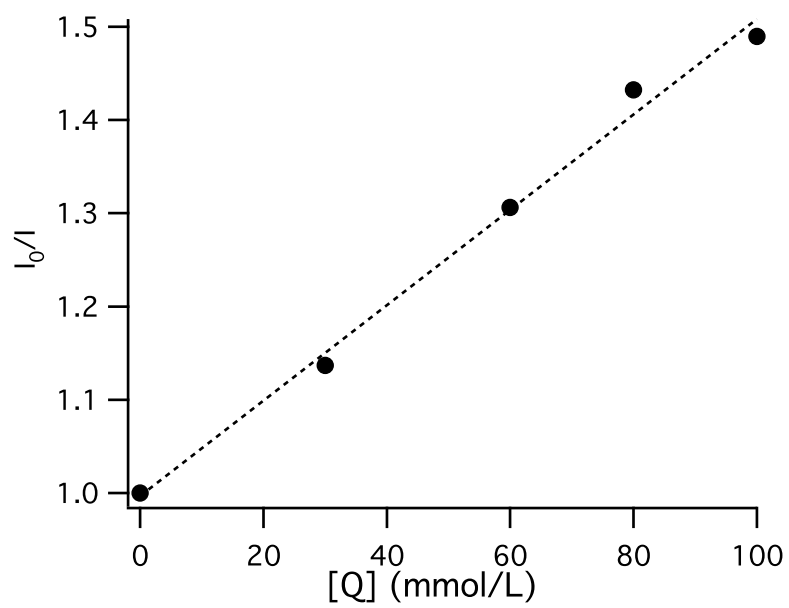

**Figure S4.** The Stern–Volmer plot of the relative fluorescence intensity to the concentration of quinone.

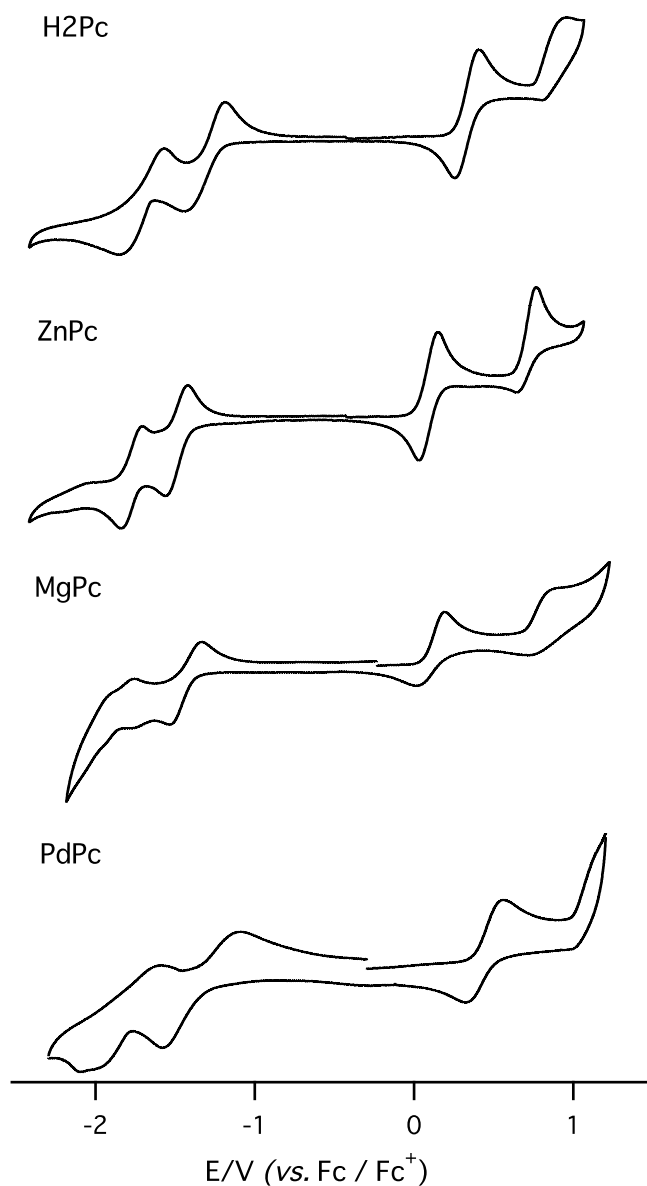

**Figure S5.** Cyclic voltammograms of the phthalocyanines; 1.0 mmol/L in CH<sub>2</sub>Cl<sub>2</sub> with 0.1 mol/L Bu<sub>4</sub>NClO<sub>4</sub>. Working electrode: glassy carbon, counter electrode: platinum wire, reference electrode: Ag/AgClO<sub>4</sub>. The measurement was performed under N<sub>2</sub> atmosphere. Fc = ferrocene.



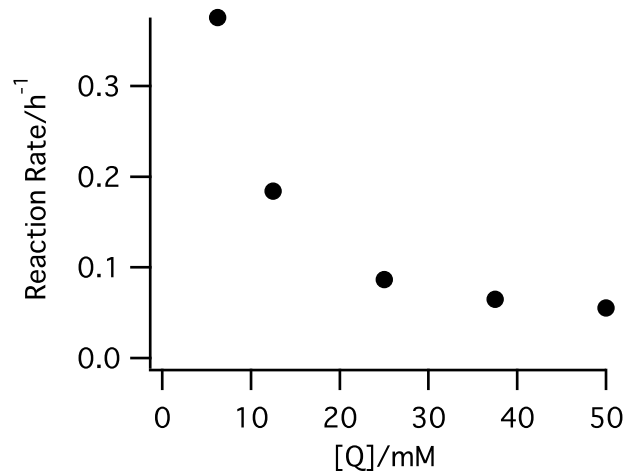

**Figure S6.** The initial rates of photoreaction with various concentrations of the quinone (2,5-di-*t*-butylbenzoquinone). Except for [Q], the conditions are the same as in Table 1, entry 3.



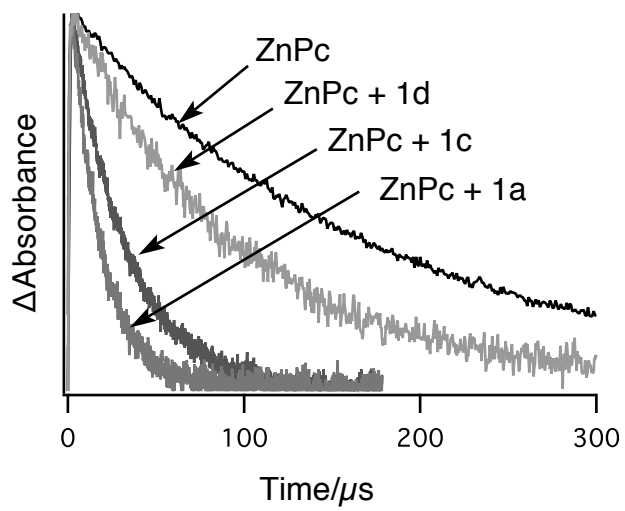

**Figure S7.** Triplet lifetime measurements of ZnPc in the presence of **1a**, **1c**, and **1d**.

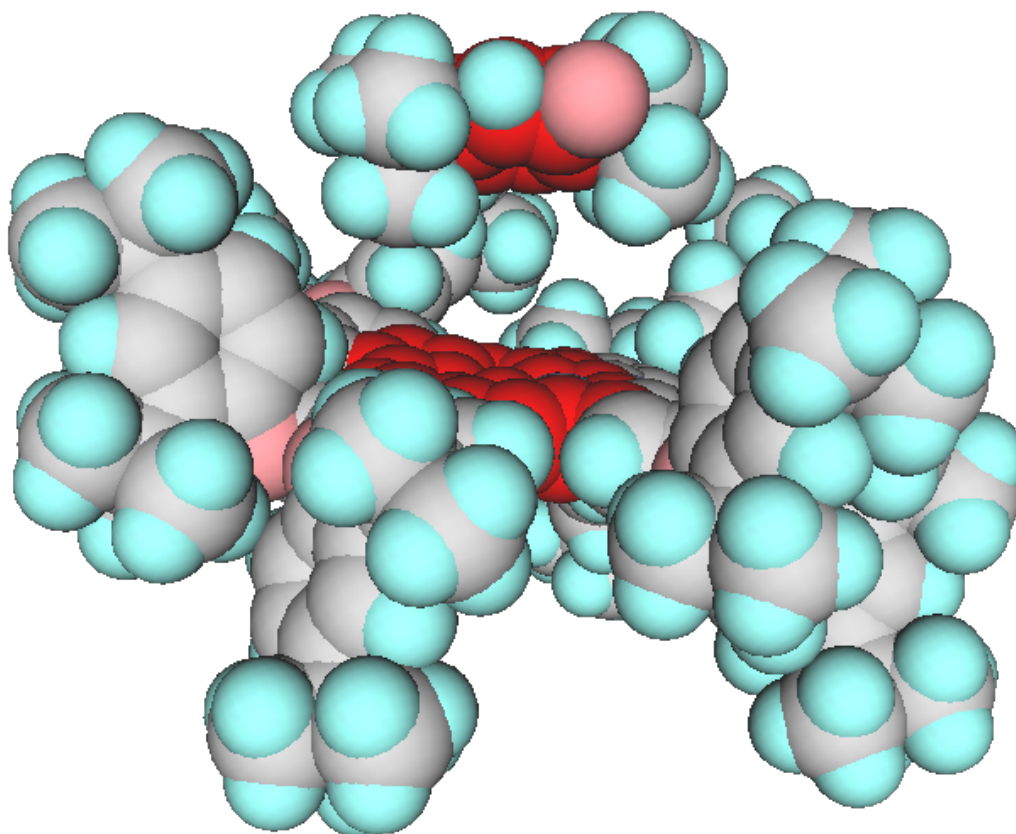

**Figure S8.** The closest encounter pair of ZnPc and quinone **1c** found by the molecular dynamics simulation. The dark red atoms are the core part of the phthalocyanine and quinone rings. The center-to-center distance was 0.806 nm. The simulation was carried out as follows. The force field parameters and partial charges were determined in a similar method as in our previous work (Kikuzawa et al. *Chem. Asian J.* 2006, **1**, 516–528). One ZnPc molecule and four quinone molecules were placed in a 4 nm×4 nm×4 nm box, and the box was filled with CHCl<sub>3</sub> solvent molecules. The molecular dynamics simulation was run under the periodic boundary conditions, with constant temperature (300 K) and pressure (1.013 bar). Total of 10<sup>7</sup> steps with 2-fs timestep were calculated (20 ns), and the atomic positions were recorded every 5000 steps.
